# Supplementary material
Source: PubMed Central journal article supplement (PMC6153662)
Supplement: zjb020184885s1.pdf [file zjb020184885s1.pdf]

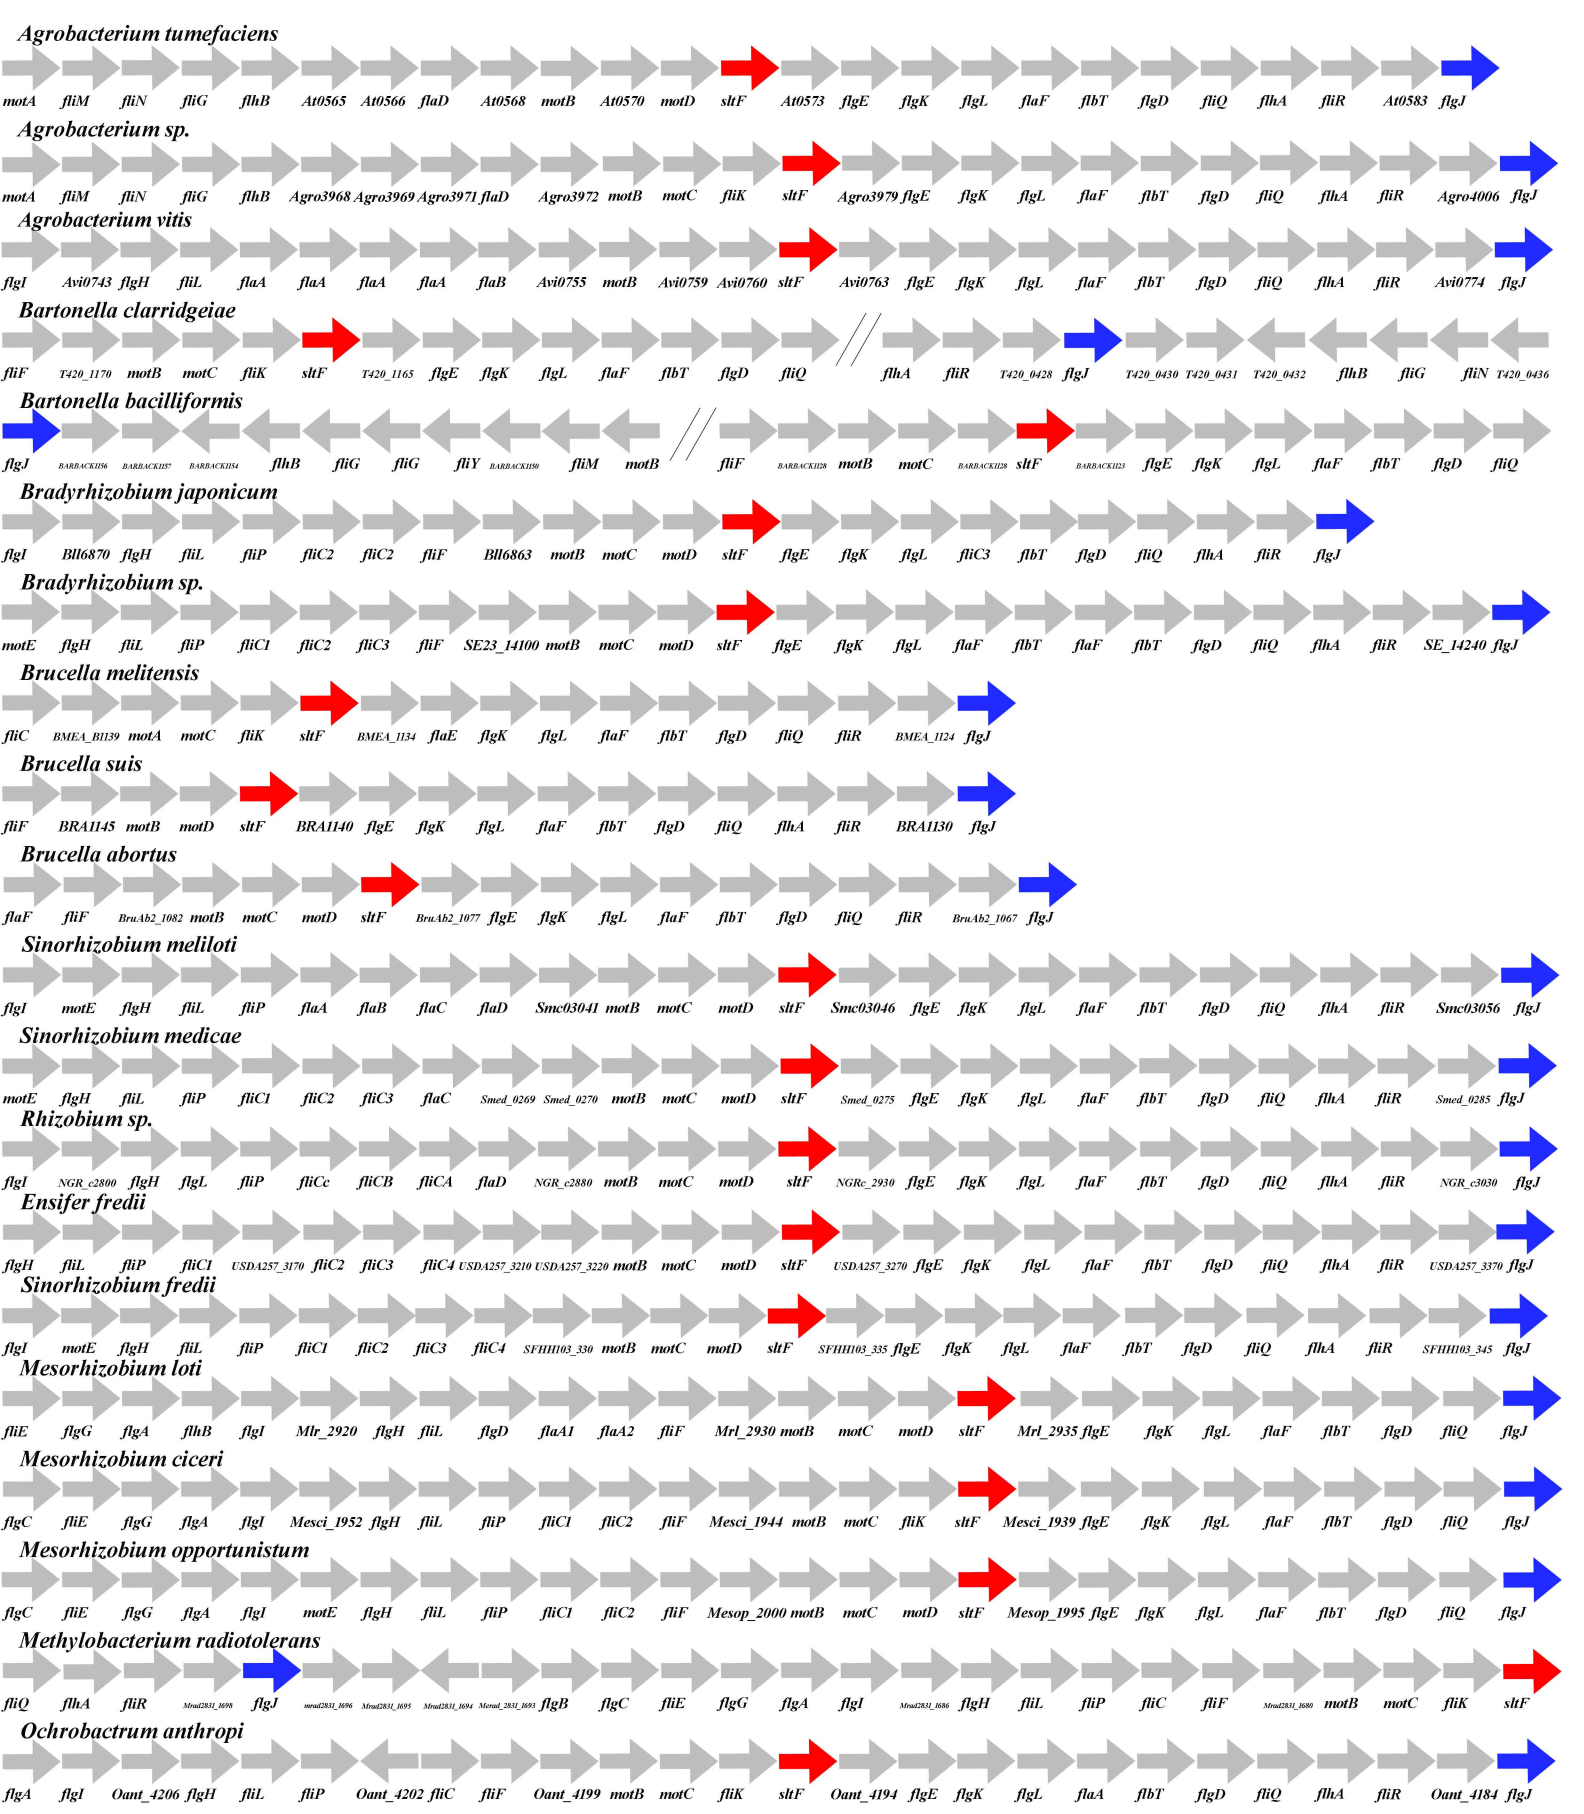

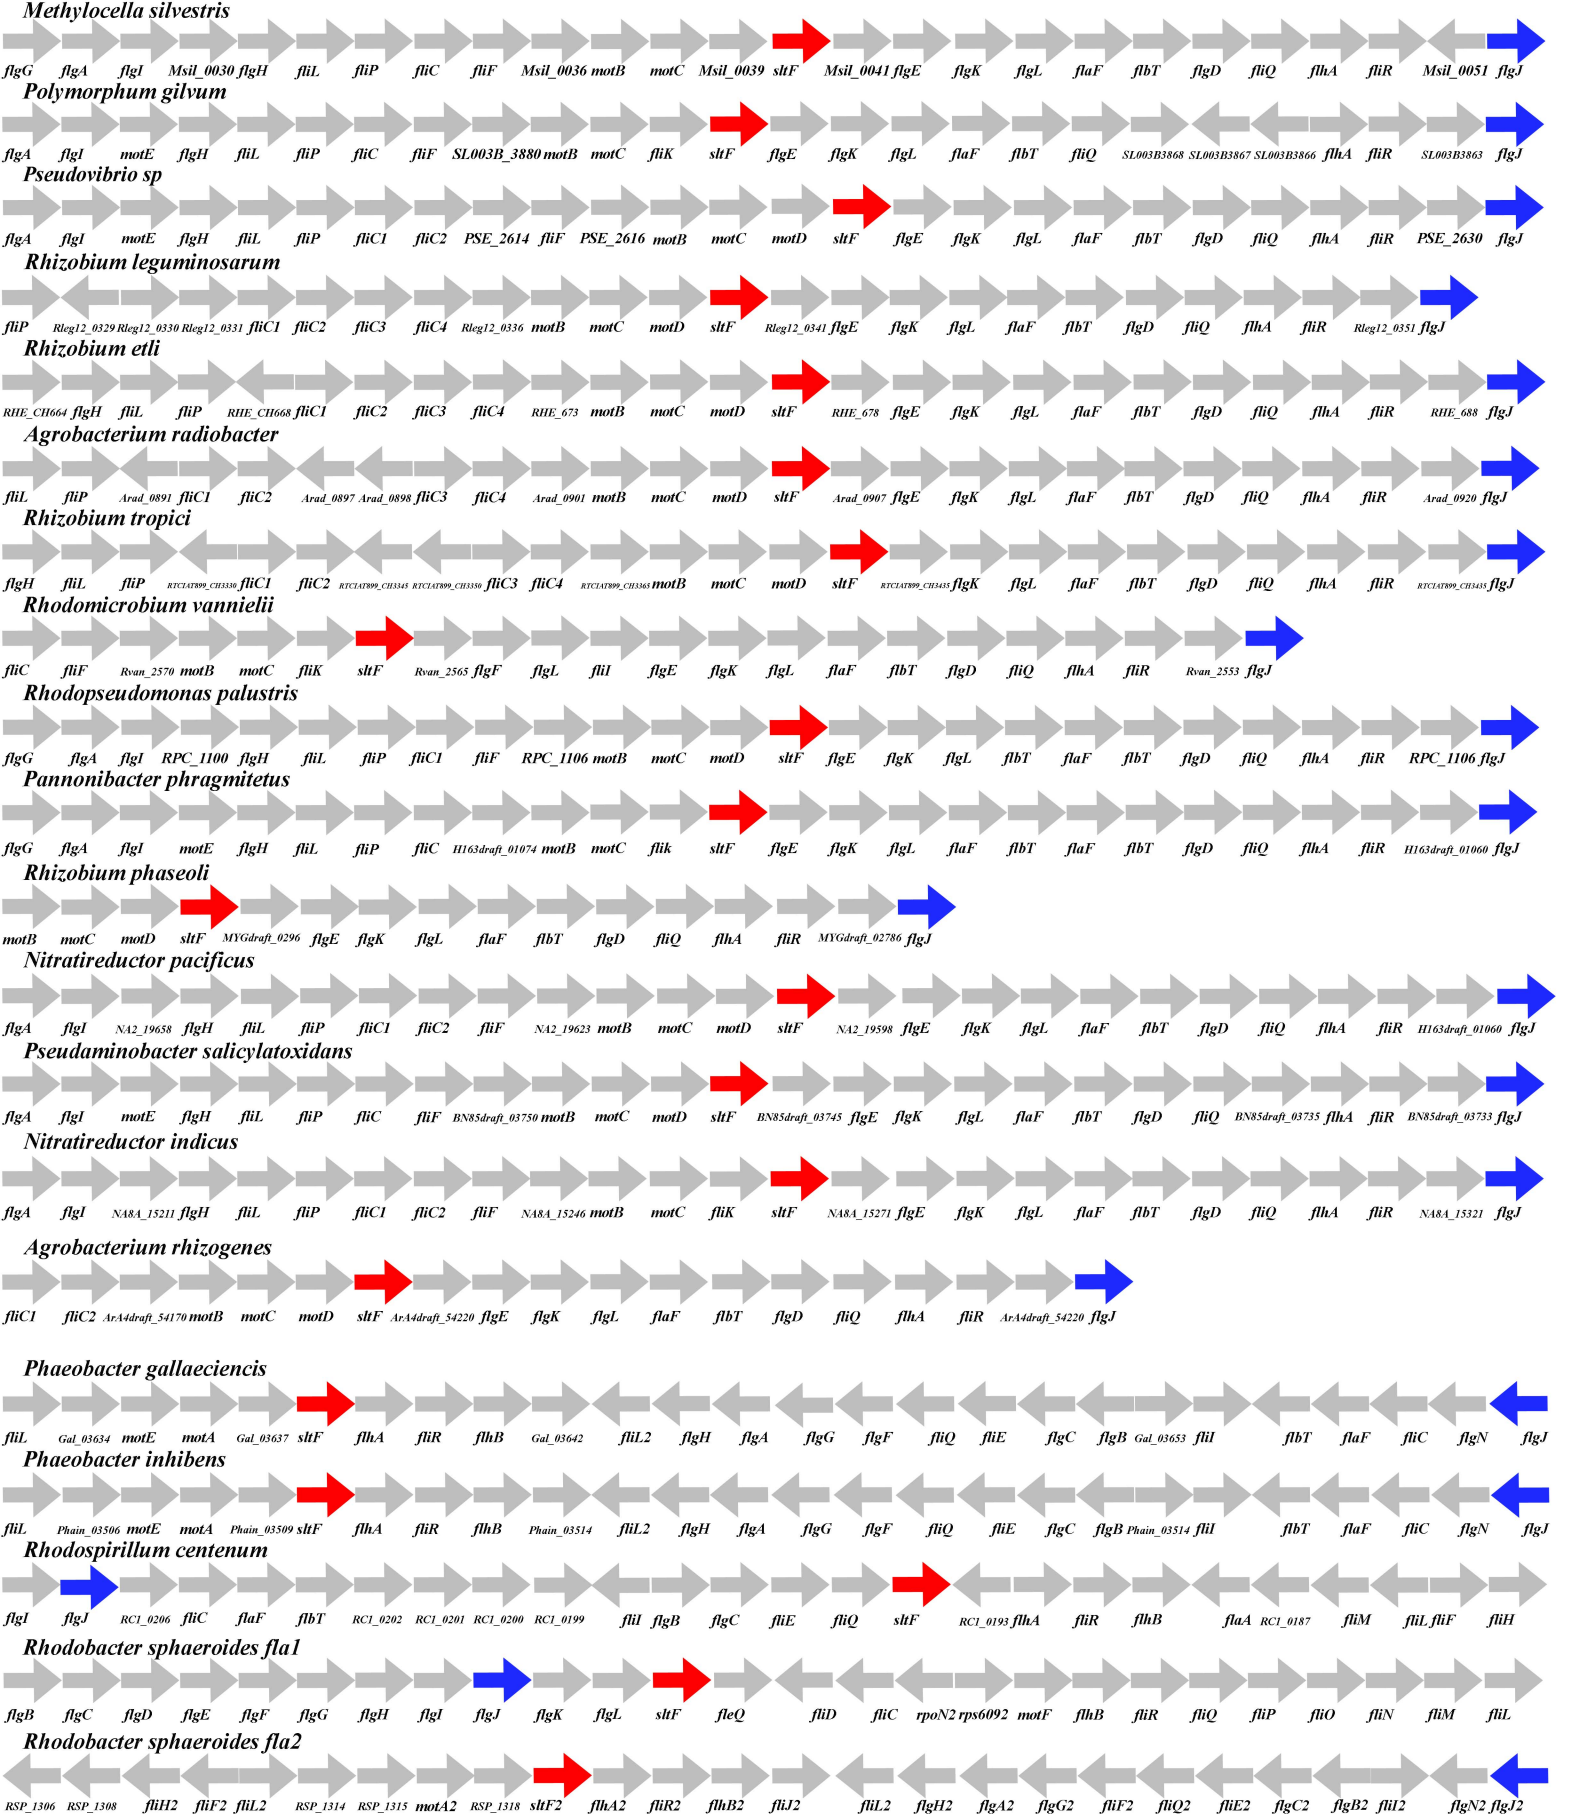

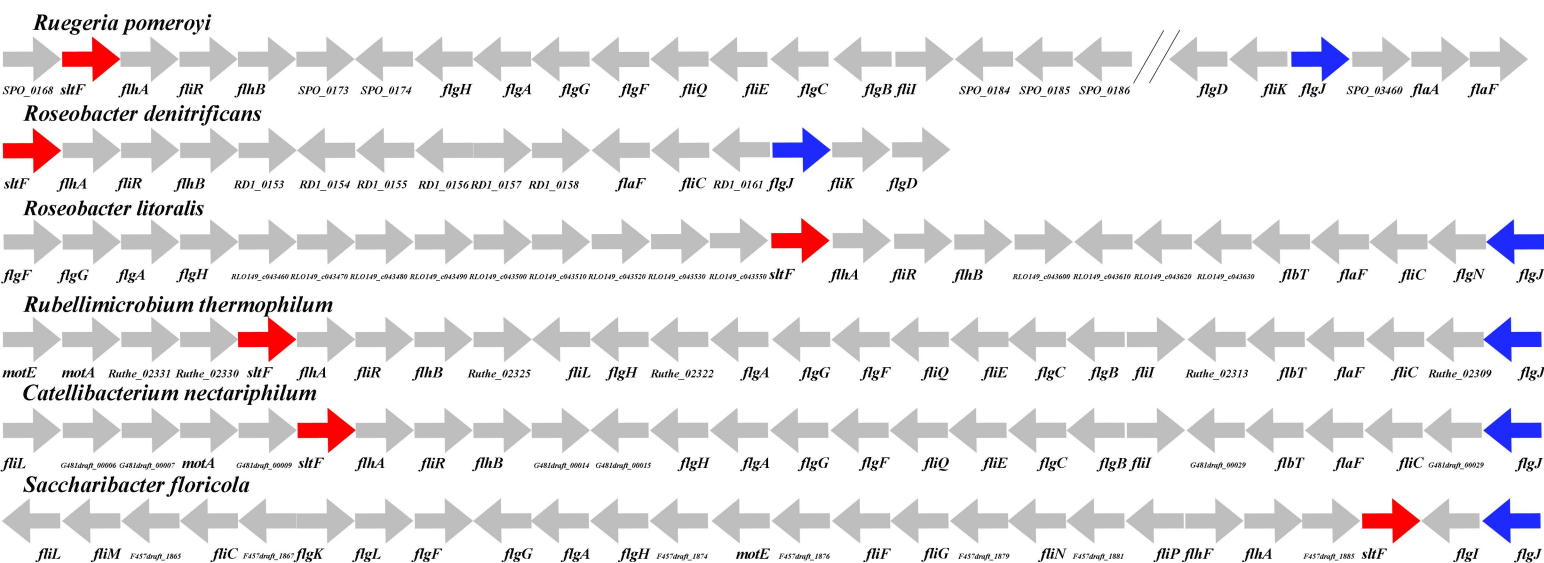

**Fig.S1 Flagellar context of lytic transglycosylases.** Graphic representation of the flagellar context of 46  $\alpha$ -proteobacteria for lytic transglycosylases and single domain scaffolding *flgJ* genes. Flagellar LT Family 1F and 1F' (SltF<sub>Bs</sub> *Brucella suis* (637332230), SltF<sub>Ba</sub> *Brucella abortus* (637647151), SltF<sub>Bm</sub>, *Brucella melitensis* (643747691), SltF<sub>Oa</sub>, *Ochrobactrum anthropi* (640836883) SltF<sub>Pp</sub>, *Pannonibacter phragmitetus* (2521738048), SltF<sub>Pg</sub>, *Polymorphum gilvum* (2512365150), SltF<sub>Rv</sub>, *Rhodomicrobium vannielii* (649746019), SltF<sub>Ms</sub>, *Methylocella silvestris* (643463373), SltF<sub>Psp</sub>, *Pseudovibrio sp* (2511538202), SltF<sub>Mf</sub>, *Methylobacterium radiotolerans* (641627382), SltF<sub>Bsp</sub> *Bradyrhizobium sp.* (2514088350), SltF<sub>Bj</sub> *Bradyrhizobium japonicum*, (637374448), SltF<sub>Rp</sub>, *Rhodopseudomonas palustris* (637924221), SltF<sub>Bb</sub>, *Bartonella bacilliformis* (639842294), SltF<sub>Bc</sub>, *Bartonella clarridgeiae* (2548760840), SltF<sub>Mo</sub>, *Mesorhizobium opportunistum* (2503200023), SltF<sub>Ml</sub>, *Mesorhizobium loti* (637075604), SltF<sub>Mc</sub>, *Mesorhizobium ciceri* (649871818), SltF<sub>Ps</sub>, *Pseudaminobacter salicylatoxidans* (2551926637), SltF<sub>Ni</sub>, *Nitratireductor indicus* (2520373292), SltF<sub>Np</sub>, *Nitratireductor pacificus* (2520250528), SltF<sub>Agrh</sub>, *Agrobacterium rhizogenes* (2505292958), SltF<sub>Agr</sub>, *Agrobacterium radiobacter* (643645133), SltF<sub>Rt</sub>, *Rhizobium tropici* (2524419140), SltF<sub>Rhe</sub>, *Rhizobium etli* (640437712), SltF<sub>R</sub>, *Rhizobium phaseoli* (2549960670), SltF<sub>Rhl</sub>, *Rhizobium leguminosarum* (2510372010), SltF<sub>Agv</sub>, *Agrobacterium vitis* (643650334), SltF<sub>Agsp</sub>, *Agrobacterium Sp.* (650739020), SltF<sub>Agf</sub>, *Agrobacterium tumefaciens* (639296061), SltF<sub>Rhsp</sub>, *Rhizobium sp.* (643824500), SltF<sub>Sf</sub>, *Sinorhizobium fredii* (2517638777), SltF<sub>Ef</sub>, *Ensifer fredii* (2515008689), SltF<sub>Sm</sub>, *Sinorhizobium meliloti* (637181464), SltF<sub>Sme</sub>, *Sinorhizobium medicae* (640789209), SltF<sub>Pt</sub>, *Phaeobacter inhibens* (2574253765), SltF<sub>Fga</sub>, *Phaeobacter gallaeciensis* (2558539010), SltF<sub>Sp</sub>, *Ruegeria pomeroyi* (637287661), SltF<sub>Rr</sub>, *Rubellimicrobium thermophilum* (2521341176), SltF<sub>2Rs</sub>, *Rhodobacter sphaeroides* WS8N, (651575303), SltF<sub>Cn</sub>, *Catellibacterium nectariphilum* (2525538211), SltF<sub>Rl</sub>, *Roseobacter littoralis* (2510237871), SltF<sub>Rd</sub>, *Roseobacter denitrificans* (639633682), SltF<sub>Sf</sub>, *Saccharibacter floricola* (2519014188), SltF<sub>Rce</sub>, *Rhodospirillum centenum* (643411101), SltF<sub>1Rs</sub>, *Rhodobacter sphaeroides* WS8N (651573991).

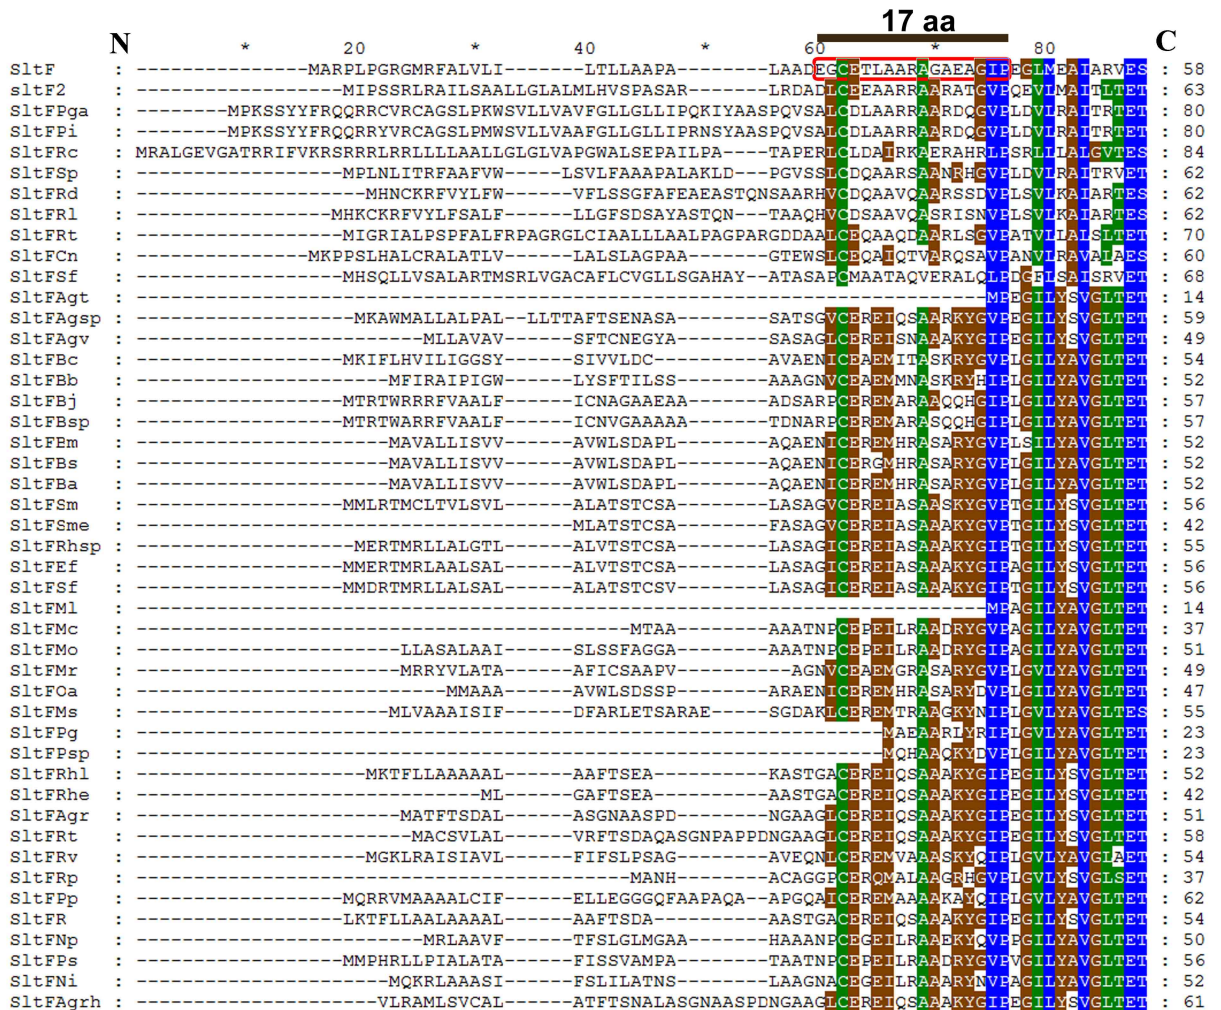

**Fig. S2** N-terminus alignment flagellar lytic transglycosylases. SltF1<sub>Rh</sub>Rhodobacter sphaeroides WSSN (651573991), SltF2<sub>Rh</sub>Rhodobacter sphaeroides WSSN (651575303), SltF<sub>Pp</sub>Phaeobacter inhibens (2574253765), SltF<sub>Pga</sub>Phaeobacter gallaeciensis (2558539010), SltF<sub>Sp</sub>Ruegeria pomeroyi (637287661), SltF<sub>Rh</sub>Rubellimicrobium thermophilum (2521341176), SltF<sub>Cc</sub>Catellibacterium nectarophilum (2525538211), SltF<sub>Rh</sub>Roseobacter litoralis (2510237871), SltF<sub>Rh</sub>Roseobacter denitrificans (639633682), SltF<sub>Ss</sub>Saccharibacter floricola (2519014188), SltF<sub>Rh</sub>Rhodospirillum centenum (643411101), SltF<sub>Bz</sub>brucella suis (637332230), SltF<sub>Bz</sub>Brucella abortus (637647151), SltF<sub>Bm</sub>Brucella melitensis (643747691), SltF<sub>Oc</sub>Ochrobacterium anthropi (640836883), SltF<sub>Pp</sub>Pannonibacter phragmitetus (2521738048), SltF<sub>Pp</sub>Polymorphum gilvum (2512365150), SltF<sub>Rh</sub>Rhodomicrobium vannielii (649746019), SltF<sub>Mt</sub>Methylocella silvestris (643463373), SltF<sub>Psp</sub>Pseudovibrio sp (2511538202), SltF<sub>Mt</sub>Methylobacterium radiotolerans (641627382), SltF<sub>Bp</sub>Bradyrhizobium sp. (2514088350), SltF<sub>Bp</sub>Bradyrhizobium japonicum (637374448), SltF<sub>Rh</sub>Rhodospseudomonas palustris (637924221), SltF<sub>Bz</sub>Bartonella bacilliformis (639842294), SltF<sub>Bz</sub>Bartonella clarridgeae (2548760840), SltF<sub>Mt</sub>Mesorhizobium opportunistum (2503200023), SltF<sub>Mt</sub>Mesorhizobium loti (637075604), SltF<sub>Mt</sub>Mesorhizobium ciceri (649871818), SltF<sub>Pp</sub>Pseudaminobacter salicylatoxidans (2551926637), SltF<sub>Np</sub>Nitratireductor indicus (2520373292), SltF<sub>Np</sub>Nitratireductor pacificus (2520250528), SltF<sub>Agp</sub>Agrobacterium rhizogenes (2505292958), SltF<sub>Agp</sub>Agrobacterium radiobacter (643645133), SltF<sub>Rh</sub>Rhizobium tropici (2524419140), SltF<sub>Rh</sub>Rhizobium etli (640437712), SltF<sub>Rh</sub>Rhizobium phaseoli (2549960670), SltF<sub>Rh</sub>Rhizobium leguminosarum (2510372010), SltF<sub>Agp</sub>Agrobacterium vitis (643650334), SltF<sub>Agp</sub>Agrobacterium Sp. (650739020), SltF<sub>Agp</sub>Agrobacterium tumefaciens (639296061), SltF<sub>Rhp</sub>Rhizobium sp. (643824500), SltF<sub>Ss</sub>Sinorhizobium fredii (2517638777), SltF<sub>Eg</sub>Ensifer fredii (2515008689), SltF<sub>Ss</sub>Sinorhizobium meliloti (637181464), SltF<sub>Ss</sub>Sinorhizobium medicae (640789209). Access numbers for each sequence are in accordance with IMG (Integrated Microbial Genomes : <https://img.jgi.doe.gov/>) or with GenBank. In black are shown the 17 residues of SltF1 from *R. sphaeroides* studied in this work.

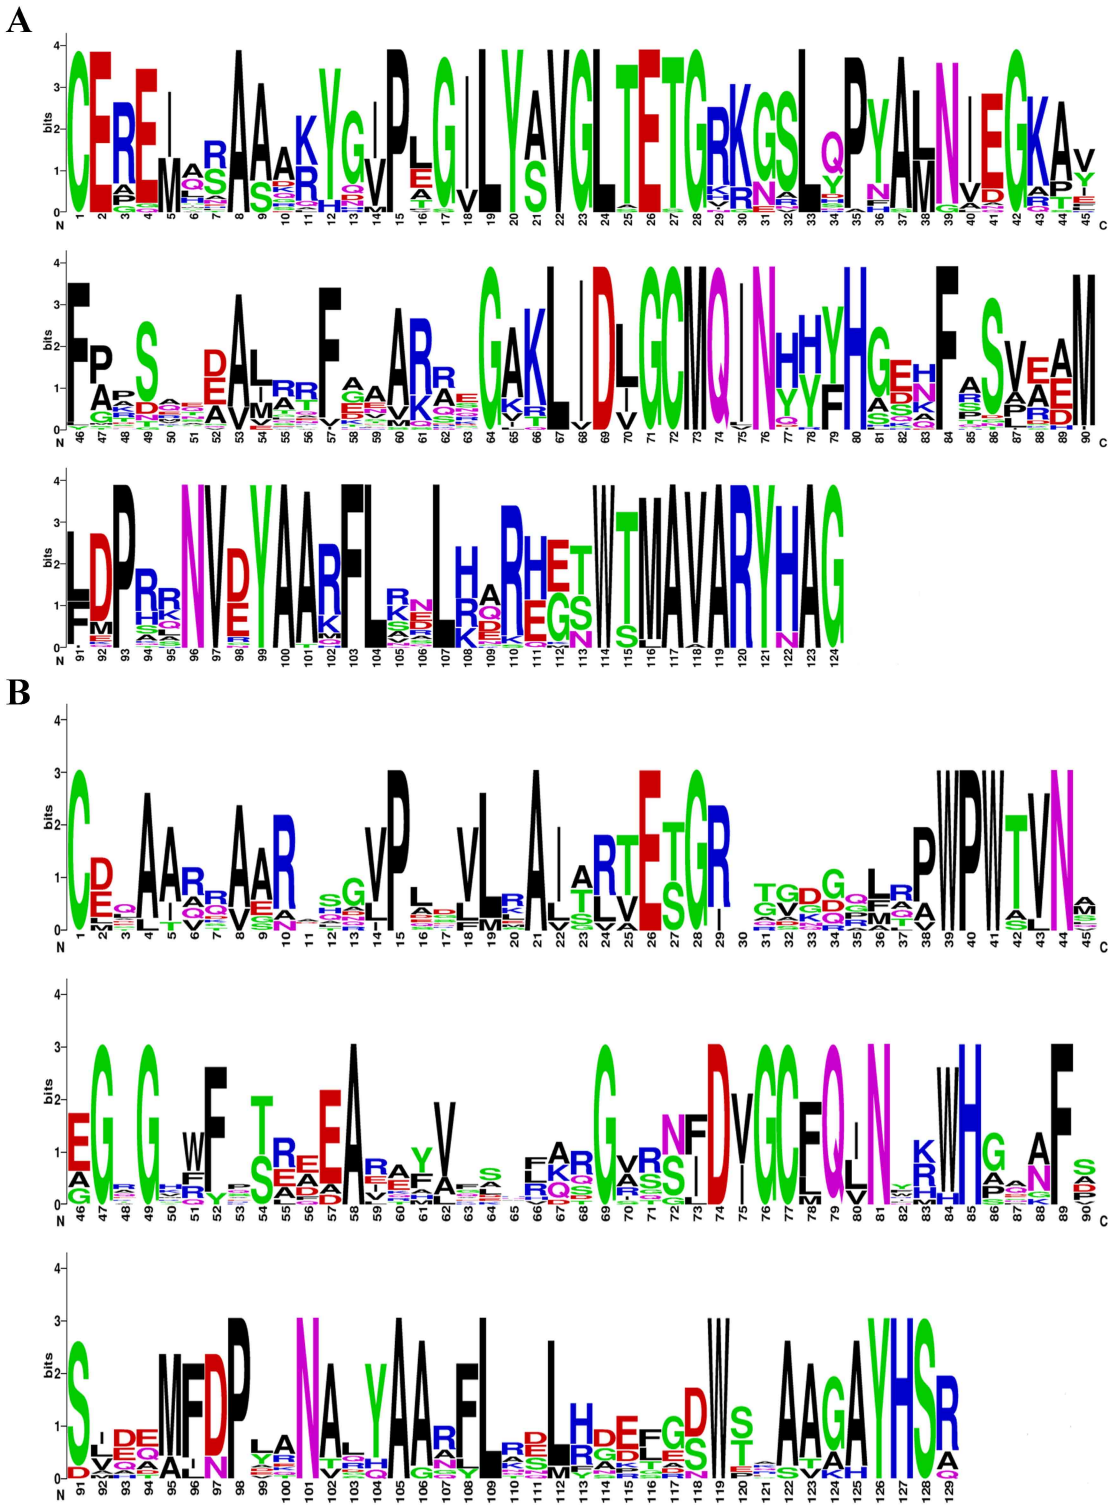

**Fig.S3 Amino acid frequency analysis.** Frequency analysis of residues within the catalytic site of SltF from subfamily 1F (Panel A) y 1F' (Panel B). This was achieved using WebLogo v2.8 (Crooks GE, Hon G, Chandonia JM, Brenner SE. 2004, WebLogo: A sequence logo generator, *Genome Research*, 14:1188-1190)

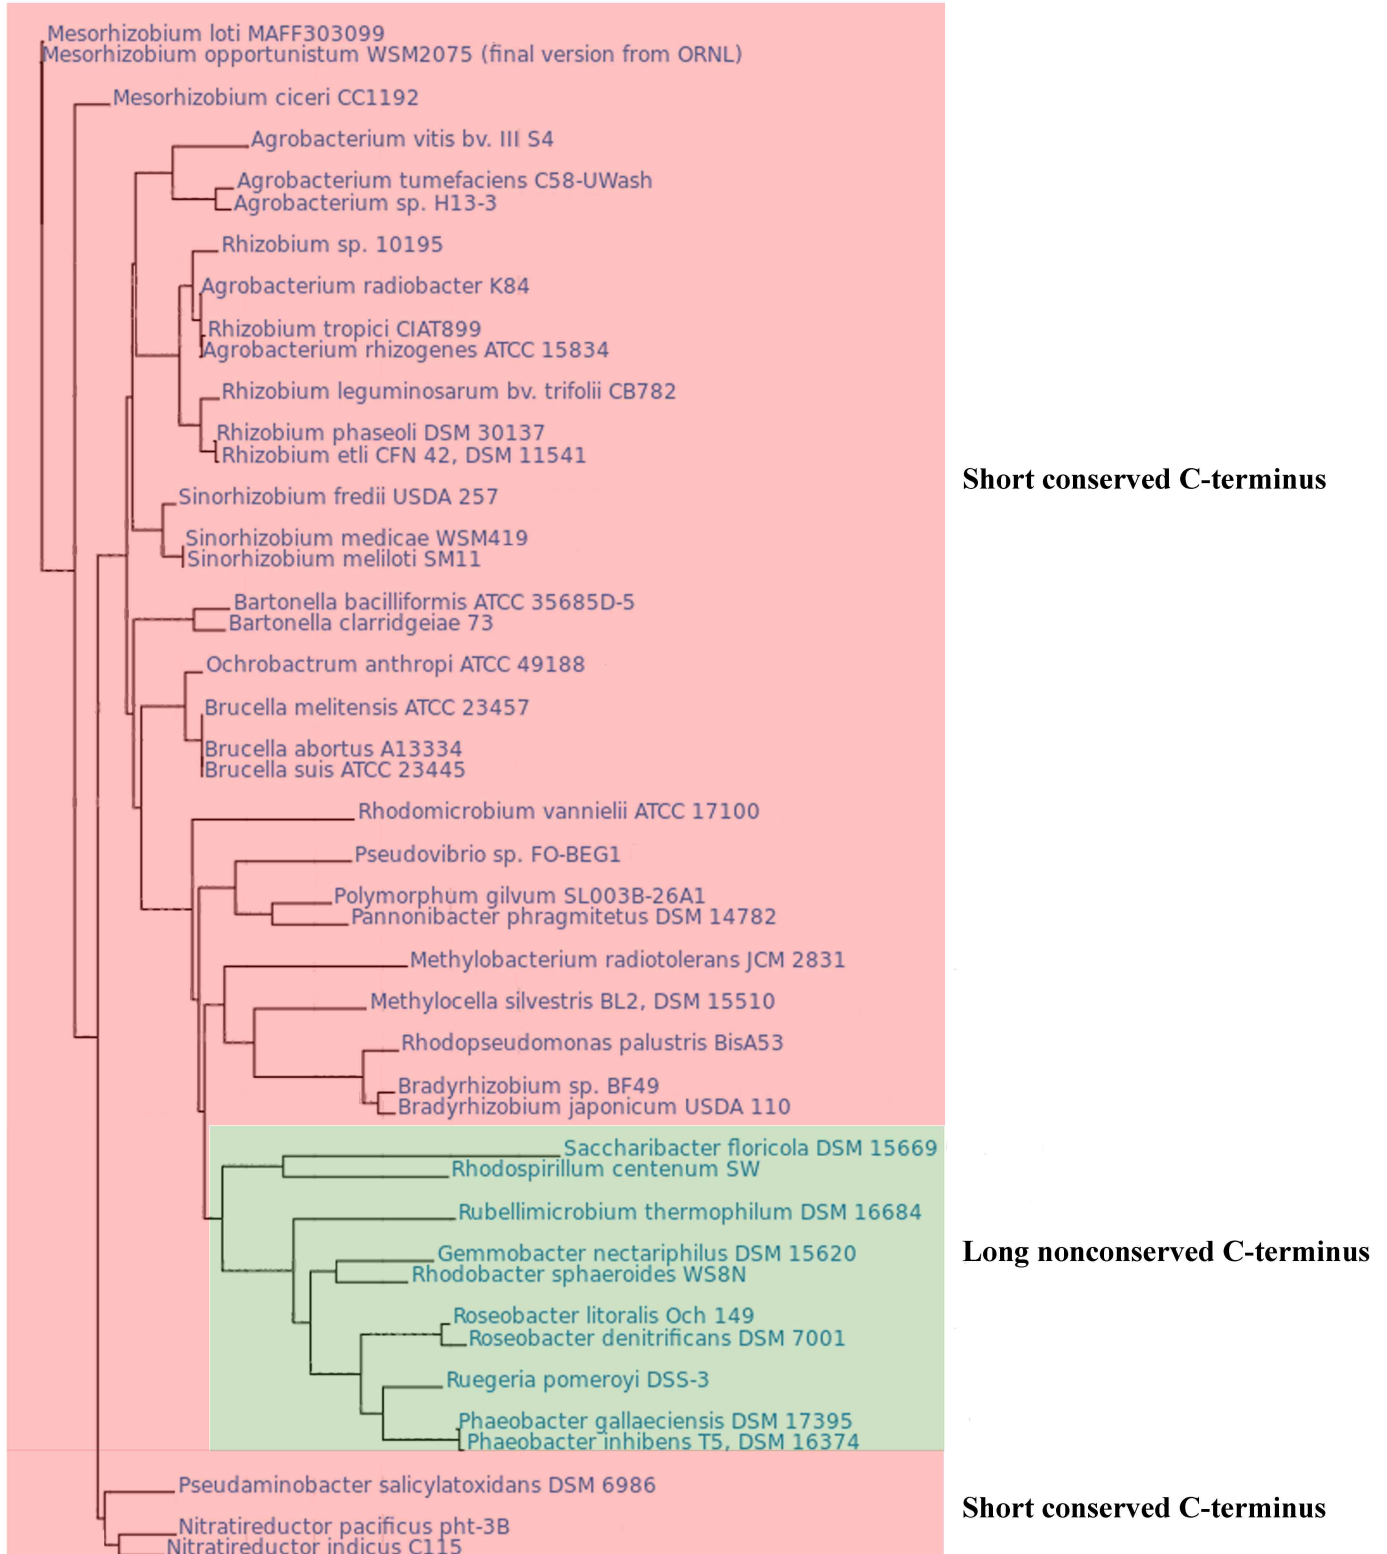

**Fig.S4 Phylogenetic tree based on 16S ribosomal RNA sequences.** The phylogenetic tree was built with sequences from 46  $\alpha$ -proteobacteria that possess single domain SltFs.

**Table S1** Sec signal sequence prediction for Transglycosylases found in this work. Access numbers correspond to the data base from IMG. Signal sequence was predicted with SignalP V 4.1 Nielsen H. 2017. Predicting Secretary Proteins with SignalP. Methods Mol Biol Clifton NJ 1611:59–73.

| <b>SlfF proteins</b> | <b>Signal sequence*</b> |
|----------------------|-------------------------|
| 639296061            | ✓                       |
| 650739020            | ✓                       |
| 643650334            | ✓                       |
| 2548760840           | ✗                       |
| 639842294            | ✓                       |
| 637374448            | ✓                       |
| 2514088350           | ✓                       |
| 643747691            | ✓                       |
| 637332230            | ✓                       |
| 637647151            | ✓                       |
| 637181464            | ✓                       |
| 640789209            | ✓                       |
| 643824500            | ✓                       |
| 2515008689           | ✓                       |
| 2517638777           | ✓                       |
| 637075604            | ✗                       |
| 649871818            | ✓                       |
| 2503200023           | ✓                       |
| 641627382            | ✓                       |
| 640836883            | ✓                       |

|            |   |
|------------|---|
| 643463373  | X |
| 2512365150 | X |
| 2511538202 | X |
| 2510372010 | ✓ |
| 640437712  | ✓ |
| 643645133  | ✓ |
| 2524419140 | ✓ |
| 649746019  | ✓ |
| 637924221  | ✓ |
| 2521738048 | X |
| 2549960670 | ✓ |
| 2520250528 | ✓ |
| 2551926637 | ✓ |
| 2520373292 | ✓ |
| 2505292958 | ✓ |
| 2558539010 | X |
| 2574253765 | X |
| 643411101  | X |
| SlitF      | ✓ |
| SlitF2     | ✓ |
| 637287661  | ✓ |
| 639633682  | ✓ |
| 2510237871 | ✓ |
| 2521341176 | ✓ |



|            |   |
|------------|---|
| 2525538211 | ✓ |
| 2519014188 | ✓ |

\* The software used was SignalP V 4.1
